# Supplementary material for: Heat Shock Causes Lower Plasmodium Infection Rates in Anopheles albimanus
Source: Front Immunol. 2021 Jun 24;12:584660. doi: 10.3389/fimmu.2021.584660 (PMC8264367; doi:10.3389/fimmu.2021.584660)
Supplement: Supplementary file 1 [file Table_1.xlsx]

## Sheet: Sheet1
Erika 20-6-2020 control						Erika 1-7-2020
S7	C1	27.21
S7	C2	28.63				S7	TOC 1	39.29
S7	C3	26.13				S7	TOC2	38.81
S7	TOP1	27.79				S7	TOC3	34.19
S7	TOP2	26.81				S7	TOP1	34.1
S7	TOP3	26.68				S7	TOP2	36.27
S7	2h1	28.15				S7	TOP3	34.65
S7	2H2	27.13				S7	2H1	33.07
S7	2H3	25.97				S7	2H2	33.17
S7	6H1	24.29				S7	2H3	31.7
S7	6H2	26.89				S7	6H1	28.66
S7	6h3	29.46				S7	6H2	33.04
HSP70	C1					S7	6H3	31.58
HSP70	C2					TET2	TOC 3	30.8
HSP70	C3	47.5899				TET2	TOC2	30.29
HSP70	TOP1	44.4151				TET2	TOC1	32.38
HSP70	TOP2	36.5198				TET2	TOP1	27.75
HSP70	TOP3	38.7373				TET2	TOP2	28.65
HSP70	2h1	47.5623				TET2	TOP3	29.35
HSP70	2H2	44.6053				TET2	2H1	30.15
HSP70	2H3	43.8148				TET2	2H2	29.45
HSP70	6H1	27.5587				TET2	2H3	28.72
HSP70	6H2	30.8985				TET2	6H2	30.59
HSP70	6h3	33.5571				TET2	6H1	29.26
DNMT2	Toc 3	34.13				TET2	6H3	29.88
DNMT2	Toc 2	37.98				FREP3	TOC 1
DNMT2	Toc 1	33.73				FREP3	TOC2
DNMT2	Top 1	27.74				FREP3	TOC3	48.2926
DNMT2	Top 2	32.21				FREP3	TOP1	36.7624
DNMT2	Top 3	37.38				FREP3	TOP2	47.036
DNMT2	2h 3	32.03				FREP3	TOP3	41.2248
DNMT2	2h 2	29.63				FREP3	2H1	40.3278
DNMT2	2h 1	30.18				FREP3	2H2	40.662
DNMT2	6h 1	30.59				FREP3	2H3	41.1761
DNMT2	6h 2	30.58				FREP3	6H1	38.2234
DNMT2	6h 3	35.46				FREP3	6H2	42.5834
DUOX	Toc 1	31.7001				FREP3	6H3	45.0976
DUOX	Toc 2	36.1303				PPO	FB TOC 1	35.63
DUOX	Toc 3	33.3095				PPO	FB TOC 2	34.596
DUOX	Top 1	28.0048				PPO	FB TOC 3	33.469
DUOX	Top 2	29.7421				PPO	FB TOP 3	37.615
DUOX	Top 3	35.8305				PPO	FB TOP 2	30.633
DUOX	2h 1	27.9677				PPO	FB TOP 1	33.481
DUOX	2h 2	32.0655				PPO1	FB T2H 1	38.925
DUOX	2h 3	30.9243				PPO3	FB T2H 2	33.917
DUOX	6h 1	29.032				PPO2	FB T2H 3	31.895
DUOX	6h 2	30.5519				PPO	FB T6H 1	31.041
DUOX	6h 3	35.53				PPO	FB T6H 2	32.48
NOS	C1	0				PPO	FB T6H 3	34.889
NOS	C2	0
NOS	C3	0
NOS	TOP1	0
NOS	TOP2	0
NOS	TOP3	0
NOS	2h1	0
NOS	2H2	0
NOS	2H3	42.8514
NOS	6H1	16.8147
NOS	6H3	20.8771
NOS	6h2	16.9459
